# Supplementary material for: Association between Recent Acetaminophen Use and Asthma: Modification by Polymorphism at TLR4
Source: PubMed Central journal article supplement — J Korean Med Sci. 2014 Apr 25;29(5):662–8. doi: 10.3346/jkms.2014.29.5.662 (PMC4024959; doi:10.3346/jkms.2014.29.5.662), 2014-04-25
Supplement: jkms-29-662-s001.pdf [file jkms-29-662-s001.pdf]

**Supplementary Table 1.** Combined associations between acetaminophen use and *GSTP1* polymorphism, rs1695, on asthma or BHR

|                           | Acetaminophen use | <i>GSTP1</i> (rs1695) | Number (%)  |             | aOR  | 95% CI lower | 95% CI upper | P value |
|---------------------------|-------------------|-----------------------|-------------|-------------|------|--------------|--------------|---------|
|                           |                   |                       | (-)         | (+)         |      |              |              |         |
| Asthma diagnosis, ever    | No                | AA                    | 508 (31.57) | 44 (27.16)  | 1.00 |              |              |         |
|                           | No                | AG+GG                 | 244 (15.16) | 25 (15.43)  | 1.06 | 0.58         | 1.91         | 0.86    |
|                           | Yes               | AA                    | 542 (33.69) | 56 (34.57)  | 1.30 | 0.81         | 2.07         | 0.27    |
|                           | Yes               | AG+GG                 | 315 (19.58) | 37 (22.84)  | 1.42 | 0.84         | 2.40         | 0.19    |
| Current asthma            | No                | AA                    | 537 (31.61) | 14 (30.43)  | 1.00 |              |              |         |
|                           | No                | AG+GG                 | 261 (15.36) | 5 (10.87)   | 0.54 | 0.15         | 1.95         | 0.34    |
|                           | Yes               | AA                    | 572 (33.67) | 16 (34.78)  | 1.14 | 0.50         | 2.57         | 0.76    |
|                           | Yes               | AG+GG                 | 329 (19.36) | 11 (23.91)  | 1.12 | 0.43         | 2.90         | 0.82    |
| BHR ( $PC_{20} \leq 16$ ) | No                | AA                    | 482 (32.20) | 83 (29.02)  | 1.00 |              |              |         |
|                           | No                | AG+GG                 | 239 (15.97) | 25 (8.74)   | 0.72 | 0.42         | 1.25         | 0.24    |
|                           | Yes               | AA                    | 491 (32.80) | 113 (39.51) | 1.23 | 0.84         | 1.81         | 0.29    |
|                           | Yes               | AG+GG                 | 285 (19.04) | 65 (22.73)  | 1.35 | 0.88         | 2.09         | 0.17    |

Data were calculated by logistic regression multivariate analysis. Current asthma, together with asthma symptoms in past 12 months, lifetime asthma diagnosis were assessed by questionnaire. BHR, bronchial hyperresponsiveness; *GSTP1*, glutathione S-transferase pi 1. aOR, odds ratio adjusted by age, sex, BMI, income, environmental tobacco smoking and family history of asthma.
