# Supplementary material for: Association between Recent Acetaminophen Use and Asthma: Modification by Polymorphism at TLR4
Source: PubMed Central journal article supplement — J Korean Med Sci. 2014 Apr 25;29(5):662–8. doi: 10.3346/jkms.2014.29.5.662 (PMC4024959; doi:10.3346/jkms.2014.29.5.662), 2014-04-25
Supplement: jkms-29-662-s002.pdf [file jkms-29-662-s002.pdf]

**Supplementary Table 2.** Combined associations between acetaminophen use and *NQO1* polymorphism, rs1800566, on asthma or BHR

|                           | Acetaminophen use | <i>NQO1</i> (rs1800566) | Number (%)  |             | aOR  | 95% CI lower | 95% CI upper | P value |
|---------------------------|-------------------|-------------------------|-------------|-------------|------|--------------|--------------|---------|
|                           |                   |                         | (-)         | (+)         |      |              |              |         |
| Asthma diagnosis, ever    | No                | GG                      | 263 (16.16) | 29 (18.01)  | 1.00 |              |              |         |
|                           | No                | GA+AA                   | 491 (30.18) | 40 (24.84)  | 0.61 | 0.35         | 1.08         | 0.09    |
|                           | Yes               | GG                      | 298 (18.32) | 32 (19.88)  | 0.84 | 0.46         | 1.55         | 0.58    |
|                           | Yes               | GA+AA                   | 575 (35.34) | 60 (37.27)  | 0.99 | 0.60         | 1.67         | 0.99    |
| Current asthma            | No                | GG                      | 280 (16.30) | 8 (17.39)   | 1.00 |              |              |         |
|                           | No                | GA+AA                   | 521 (30.33) | 11 (23.91)  | 0.65 | 0.23         | 1.86         | 0.42    |
|                           | Yes               | GG                      | 315 (18.34) | 8 (17.39)   | 0.69 | 0.21         | 2.29         | 0.55    |
|                           | Yes               | GA+AA                   | 602 (35.04) | 19 (41.30)  | 1.18 | 0.46         | 3.01         | 0.73    |
| BHR ( $PC_{20} \leq 16$ ) | No                | GG                      | 250 (16.52) | 41 (14.24)  | 1.00 |              |              |         |
|                           | No                | GA+AA                   | 471 (31.13) | 69 (23.96)  | 0.93 | 0.57         | 1.52         | 0.77    |
|                           | Yes               | GG                      | 268 (17.71) | 67 (23.26)  | 1.29 | 0.77         | 2.19         | 0.34    |
|                           | Yes               | GA+AA                   | 524 (34.63) | 111 (38.54) | 1.32 | 0.83         | 2.10         | 0.24    |

Data were calculated by logistic regression multivariate analysis. Current asthma, together with asthma symptoms in past 12 months, lifetime asthma diagnosis were assessed by questionnaire. BHR, bronchial hyperresponsiveness; *NQO1*, NAD(P)H quinone oxidoreductase-1. aOR, odds ratio adjusted by age, sex, BMI, income, environmental tobacco smoking and family history of asthma.
